# Supplementary material for: Ratiometric Organic Fibers for Localized and Reversible Ion Sensing with Micrometer‐Scale Spatial Resolution
Source: PubMed Central journal article supplement — Small. 2015 Nov 5;11(48):6417–24. doi: 10.1002/smll.201502171 (PMC4738409; doi:10.1002/smll.201502171), 2015-11-05
Supplement: SMLL-11-6417-s001.pdf [file SMLL-11-6417-s001.pdf]

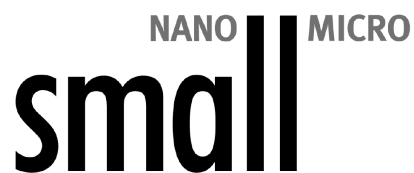

## Supporting Information

for *Small.*, DOI: 10.1002/sml.201502171

**Ratiometric Organic Fibers for Localized and Reversible Ion Sensing with Micrometer-Scale Spatial Resolution**

*Loretta L. del Mercato, \* Maria Moffa, Rosaria Rinaldi, and Dario Pisignano*

Copyright WILEY-VCH Verlag GmbH & Co. KGaA, 69469 Weinheim, Germany, 2013.

## Supporting Information

### **Ratiometric Organic Fibers for Localized and Reversible Ion Sensing with Micrometer-Scale Spatial Resolution**

*Loretta L. del Mercato\*, Maria Moffa, Rosaria Rinaldi, Dario Pisignano\**

Dr. Loretta L. del Mercato, CNR NANOTEC - Istituto di Nanotecnologia, Polo di Nanotecnologia c/o Campus Ecotekne, via Monteroni 73100 Lecce, Italy.

E-mail: [loretta.delmercato@nanotec.cnr.it](mailto:loretta.delmercato@nanotec.cnr.it)

Dr. Maria Moffa, Prof. Dr. Rosaria Rinaldi, Prof. Dr. Dario Pisignano

Istituto Nanoscienze-CNR, Euromediterranean Center for Nanomaterial Modelling and Technology (ECMT), via Arnesano 73100, Lecce, Italy

Prof. Dr. Rosaria Rinaldi, Prof. Dr. Dario Pisignano

Dipartimento di Matematica e Fisica “Ennio De Giorgi”, Università del Salento, Via Arnesano, 73100 Lecce, Italy

E-mail: [loretta.delmercato@nanotec.cnr.it](mailto:loretta.delmercato@nanotec.cnr.it)

E-mail: [dario.pisignano@unisalento.it](mailto:dario.pisignano@unisalento.it)

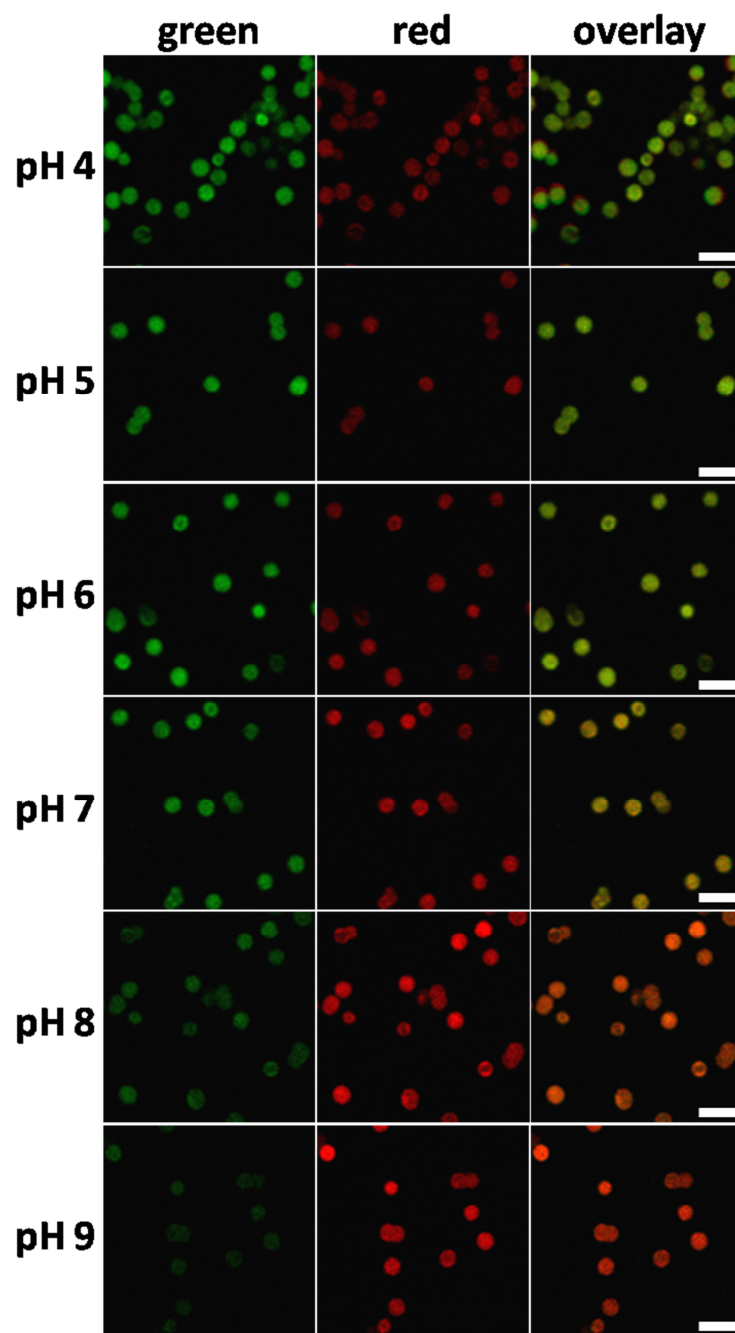

**Figure S1.** Fluorescent micrographs of capsule-based pH sensors at different pHs. The individual green (false color, 540-610 nm) and red (620-700 nm) are shown, followed by overlay of the two channels. Scale bars = 5  $\mu$ m.

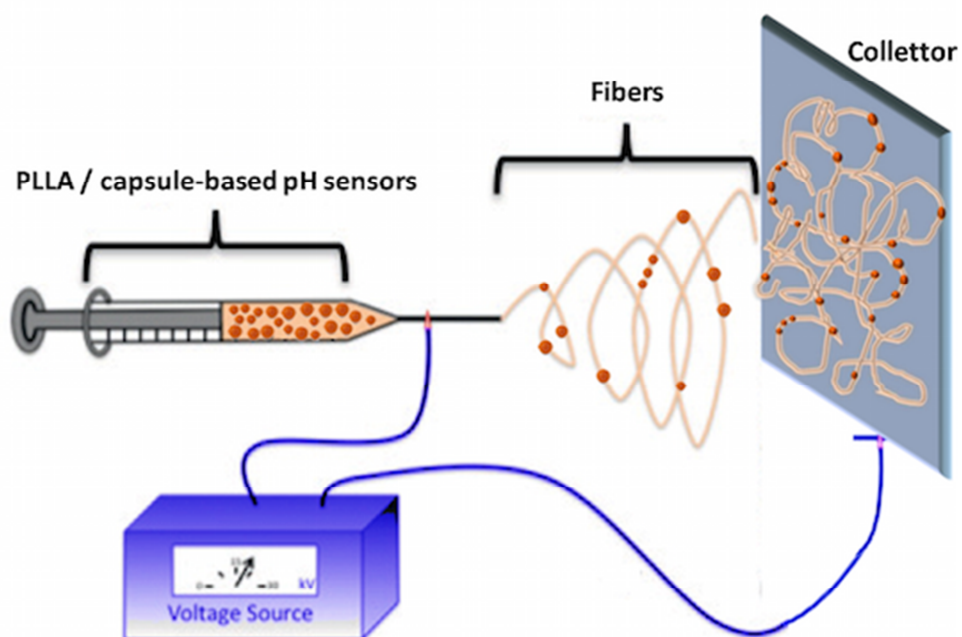

**Figure S2.** Schematic drawing of the electrospinning setup.

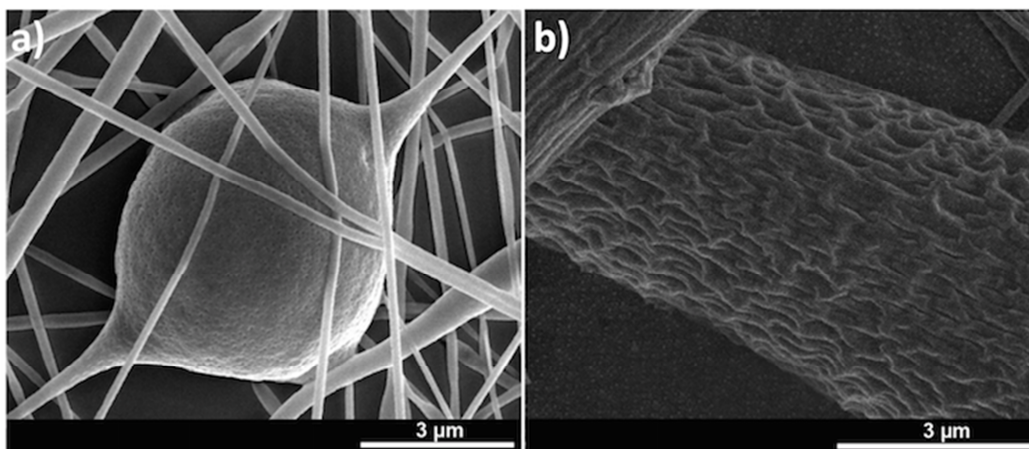

**Figure S3.** SEM micrographs showing the fiber porosity in the sensing region (a) and the roughness on the body of individual wires (b).

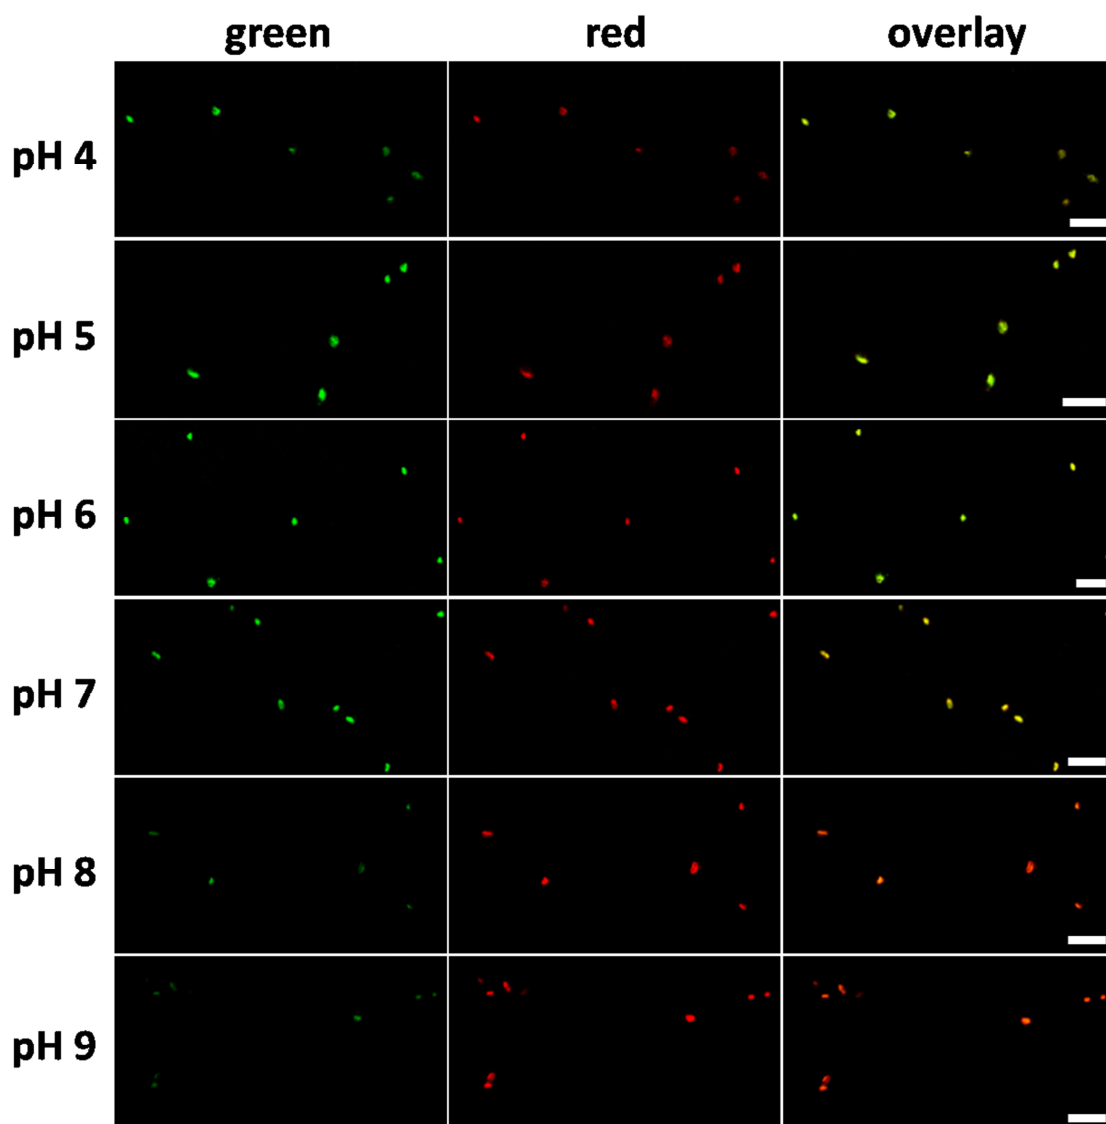

**Figure S4.** Fiber fluorescence micrographs. Average fiber diameter = 300 nm. The individual green (false color, 540-610 nm) and red (620-700 nm) channels together with channel overlay are shown. Scale bars = 20  $\mu\text{m}$ .

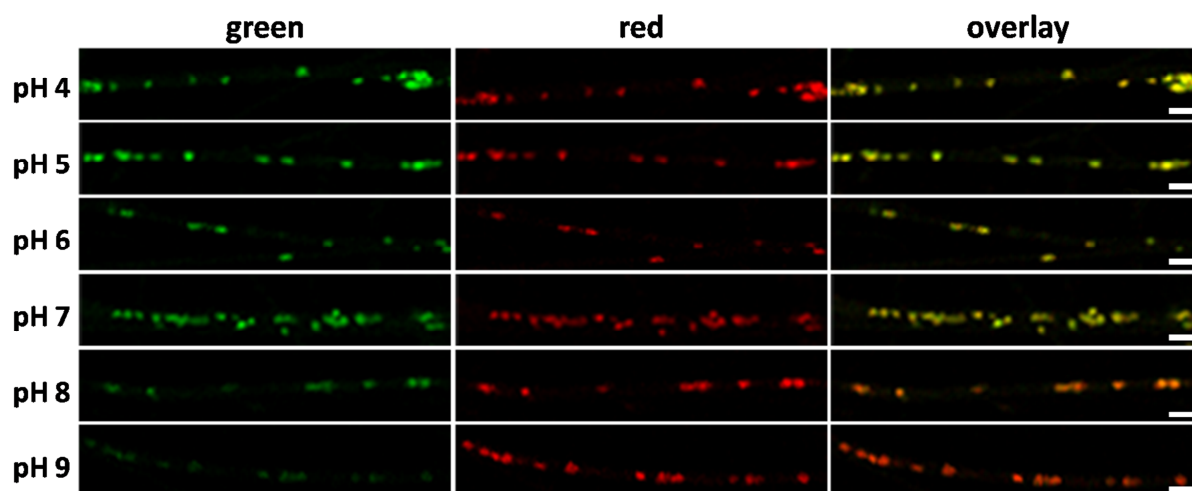

**Figure S5.** Fiber fluorescence micrographs. Average fiber diameter = 3  $\mu\text{m}$ . The individual green (false color, 540-610 nm) and red (620-700 nm) together with channel overlay are shown. Scale bars = 10  $\mu\text{m}$ .

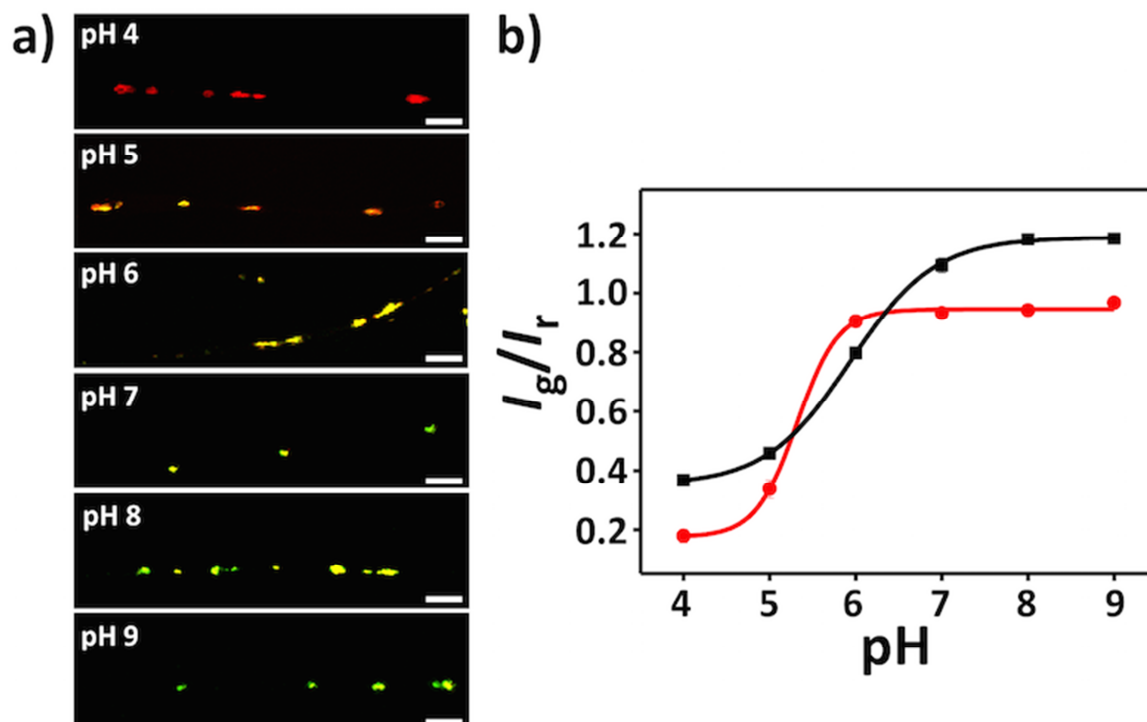

**Figure S6.** Hybrid fibers embedding capsules loaded with fluorescein 5(6)-isothiocyanate (FITC)- and rhodamine B isothiocyanate (RITC)-dextran conjugates. The pH-sensitive dye, FITC ( $M_w = 389.38$  Da, Sigma), and the reference dye, RITC ( $M_w = 536.08$  Da, Sigma), were covalently linked to the nonfluorescent aminodextran and subsequently co-loaded into the cavities of the capsules as previously described.<sup>[1,2]</sup> Next, the capsules were embedded within 3  $\mu\text{m}$ -thick PLLA fibers, according to the procedure described in the “Experimental Section” for SNARF-1-dextran conjugate loaded capsules. Finally, the pH-sensitivity of the free capsules and of the fibers was monitored by recording the fluorescent response to various pHs from 4 to 9. (a) CLSM micrographs showing the pH-dependence of fluorescence in pH-adjusted cell medium ( $\lambda_{\text{exc}}$  FITC = 488 nm,  $\lambda_{\text{exc}}$  RITC = 543 nm). Overlays of the fluorescence channels (green channel: 505–530 nm, red channel:  $>560$  nm) are reported. By increasing the pH of the medium the overall color of the pH-sensing capsules shifts from “red” over “yellow” to “green” as result of the pH dependence of FITC (indicator dye) and the insensitivity of RITC (reference dye). Scale bars: 10  $\mu\text{m}$ . (b) Ratiometric calibration curve of free capsule-based sensors (black squares) and sensors in 3  $\mu\text{m}$ -thick wires (red circles), by fluorescence intensity ratio of green and red channels derived from CLSM micrographs. The green-to-red ratio (false colors) of the fluorescence signal  $I_g/I_r$  is here plotted vs. the pH of the solution. The data points correspond to the mean  $\pm$  standard error of mean, calculated over at least 35 capsules. Data were fitted with a sigmoidal function,<sup>[2]</sup> having points of inflection at pH = 5.94 (black fit) and 5.32 (red fit), respectively.



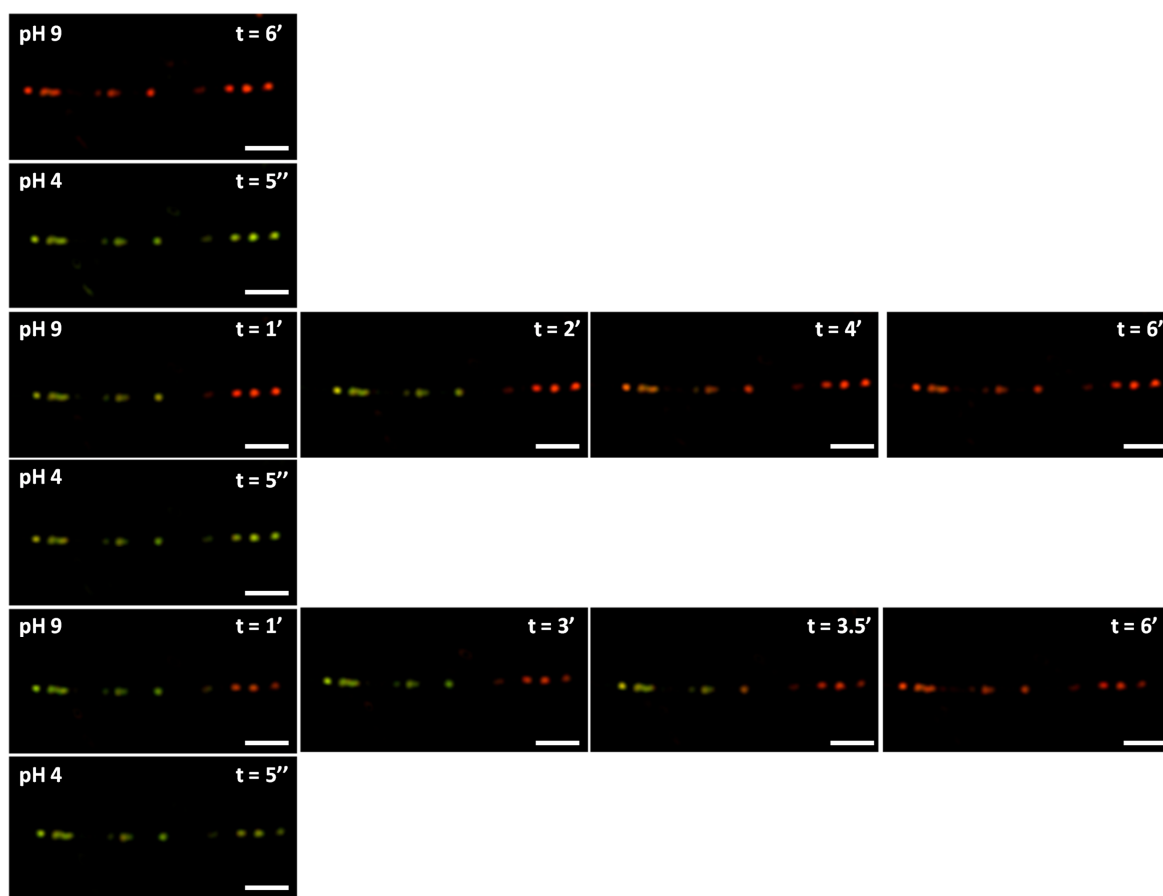

**Figure S7.** Fluorescence time response to pH variations. The CLSM micrographs show the overlays of the green (false color, 540-610 nm) and red (620-700 nm) channels. The  $t$  values for each frame indicate the time after the application of a pH change. The analysis shows a slower response of 3  $\mu\text{m}$ -thick fibers to basic pHs (9) compared to acidic pHs (4). Average fiber diameter = 3  $\mu\text{m}$ . Scale bars = 20  $\mu\text{m}$ .

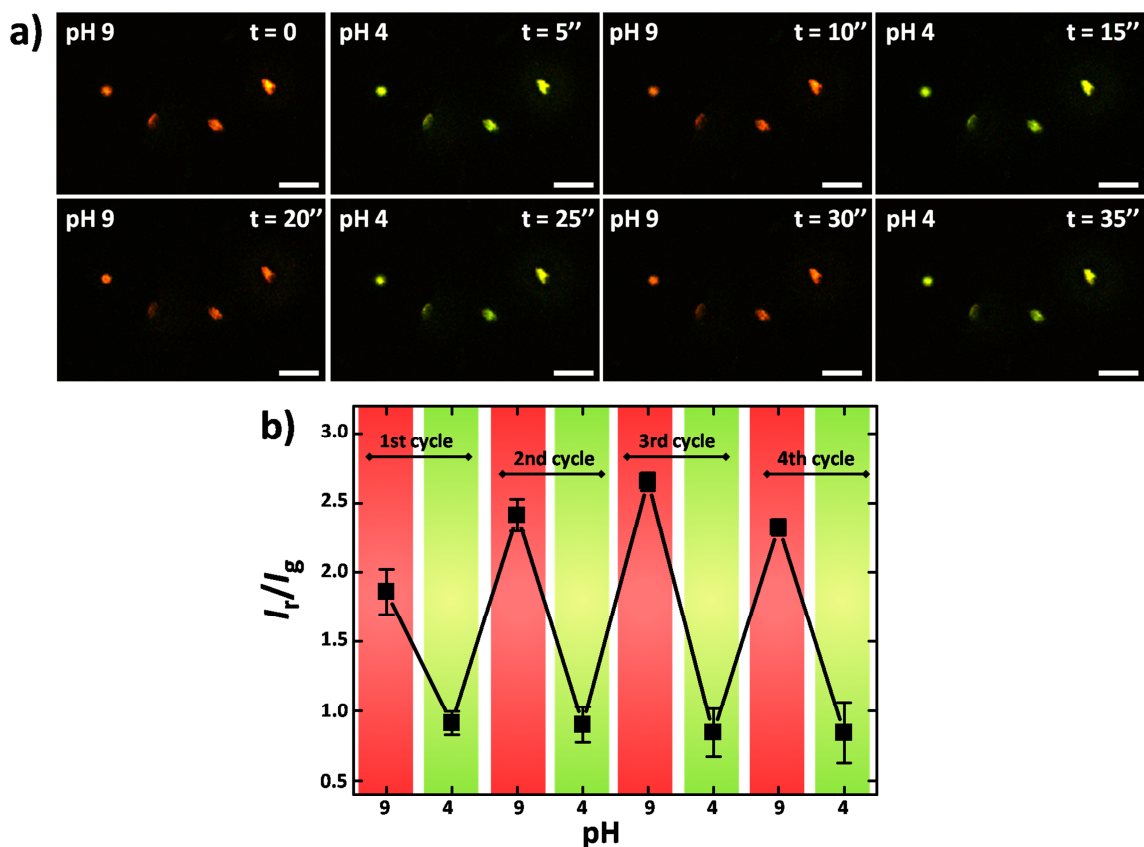

**Figure S8.** Reversible response of pH-sensing. Fibers were imaged via CLSM after addition of a drop of solution at pH 9. Next, a drop of solution at pH 4 was deposited onto the same region. The cycle was repeated up to 40 times. (a) Overlay of green (false color, 540-610 nm) and red (620-700 nm) channels recorded at each tested pH. The  $t$  values for each frame indicate the time after the application of a pH change. Average fiber diameter = 300 nm. Scale bars = 10  $\mu\text{m}$ . (b) Red-to-green ratio (false colors) of the fluorescence signal  $I_r/I_g$  vs. pH.

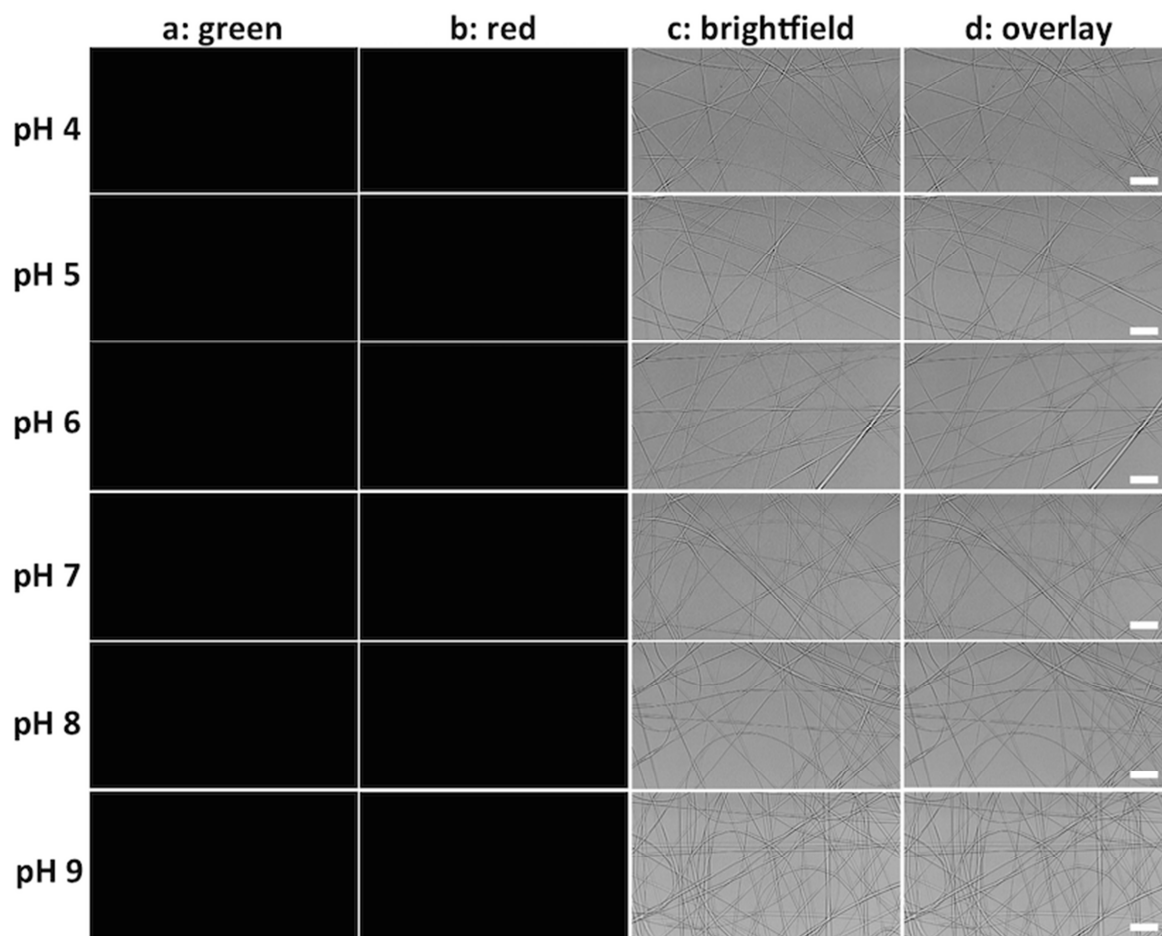

**Figure S9.** Control experiments. CLSM images of PLLA fibers under different pHs. 20  $\mu\text{L}$  droplets of pH-adjusted buffers (4, 5, 6, 7, 8, and 9) were deposited onto a region of 3  $\mu\text{m}$ -thick fibers (without capsules) for 20 minutes; emission was collected in green channel ( $\lambda_{\text{em}} = 540\text{--}610$  nm, a) and red channel ( $\lambda_{\text{em}} = 620\text{--}700$  nm, b).  $\lambda_{\text{exc}} = 514$  nm. (c) are bright field images and (d) are corresponding overlay images. Brightness and contrast levels in the bright field channel have been adjusted for better visualizing the fibers. Scale bars: 20  $\mu\text{m}$ . No fluorescence is detected from PLLA fibers under the different pHs.

## References

- [1] L. L. del Mercato, A. Z. Abbasi, W. J. Parak, *Small* **2011**, 7, 351.
- [2] M. De Luca, M. M. Ferraro, R. Hartmann, P. Rivera-Gil, A. Klingl, M. Nazareus, A. Ramirez, W. J. Parak, C. Bucci, R. Rinaldi, L. L. del Mercato, *ACS Appl. Mater. Interfaces* **2015**, 15, 15052.
